# Supplementary material for: Intelligent phase-transition MnO2 single-crystal shell enabling a high-capacity Li-rich layered cathode in Li-ion batteries
Source: Royal Society of Chemistry journal article supplement (doi:10.1039/d1ra01561c), 2021-01-01
Supplement: d1ra01561c1.pdf [file d1ra01561c1.pdf]

## Supplementary Material

### **Intelligent phase-transition MnO<sub>2</sub> single-crystal shell enabling high-capacity Li-rich layered cathode in Li-ion batteries**

**Deyuan Liu, Jian Yang, Junming Hou, Jiakuan Liao, Mengqiang Wu\***

*School of Materials and Energy, University of Electronic Science and Technology of China, 2006 Xiyuan Ave, West High-Tech Zone, Chengdu, 611731, P. R. China*

---

\* Corresponding author. E-mail: [mwu@uestc.edu.cn](mailto:mwu@uestc.edu.cn) (Mengqiang Wu)

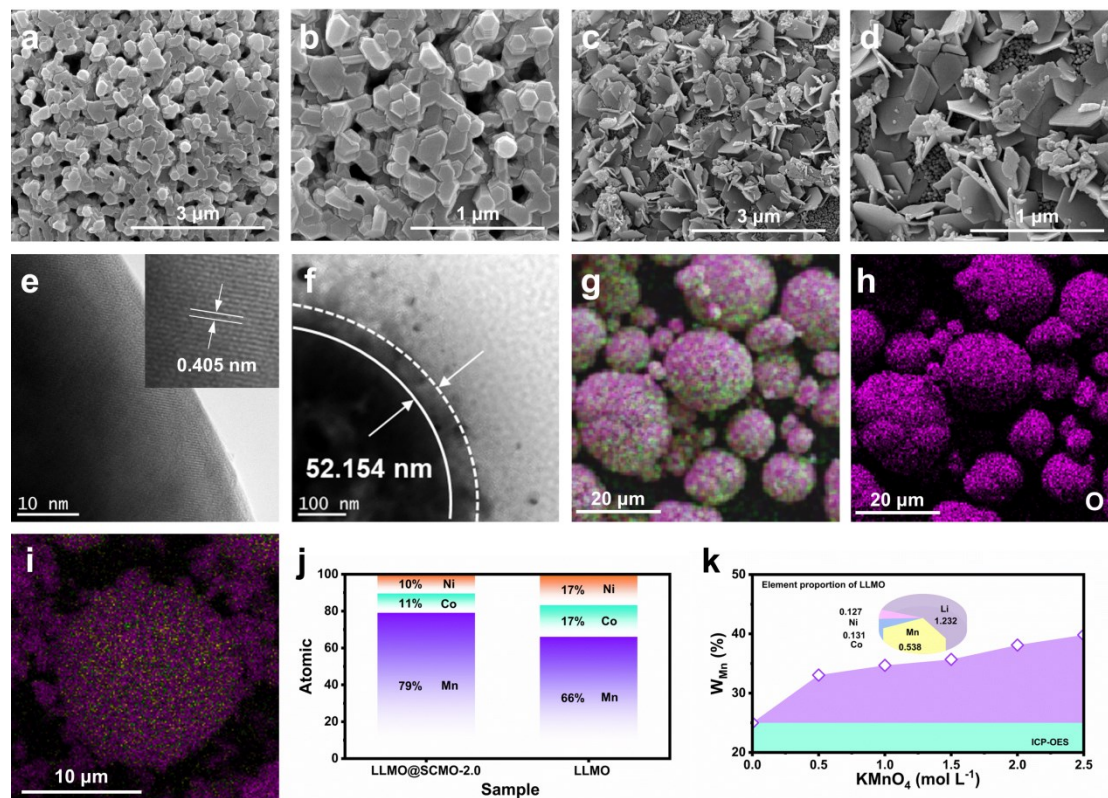

**Figure S1.** (a-b, c-d) SEM images of LLMO and SCMO@LLMO-2.0, (e) HRTEM image of LLMO, (f) TEM images of SCMO@LLMO-2.0, (g, h) EDS mapping images of LLMO, (i) SCMO@LLMO-2.0, (j) EDS Atomic (%) of SCMO@LLMO-2.0 and LLMO, (k) ICP-OES element proportion of LLMO and  $W_{Mn}$  (%) of SCMO@LLMOs.

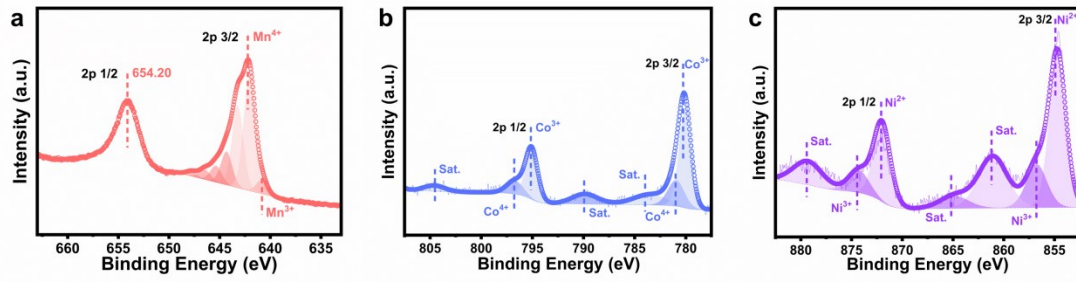

**Figure S2.** (a-c) The X-ray photoelectron spectroscopy (Mn, Co and Ni) of LLMO.

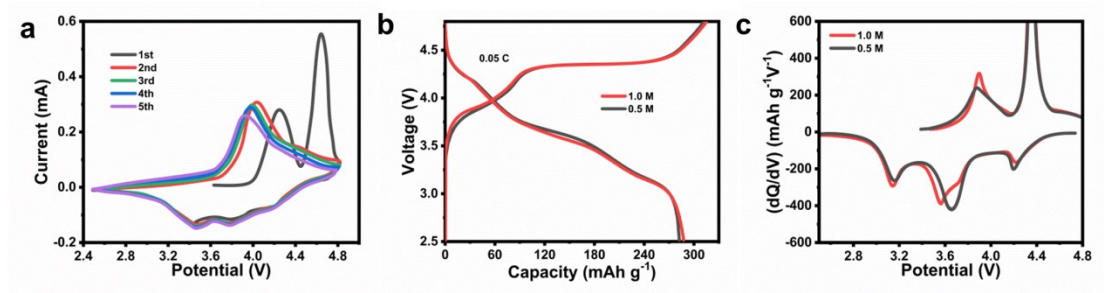

**Figure S3.** (a) The CV curve of LLMO, (b) The initial charge and discharge curves of SCMO@LLMOs, (c) The capacity differential curve of (b).

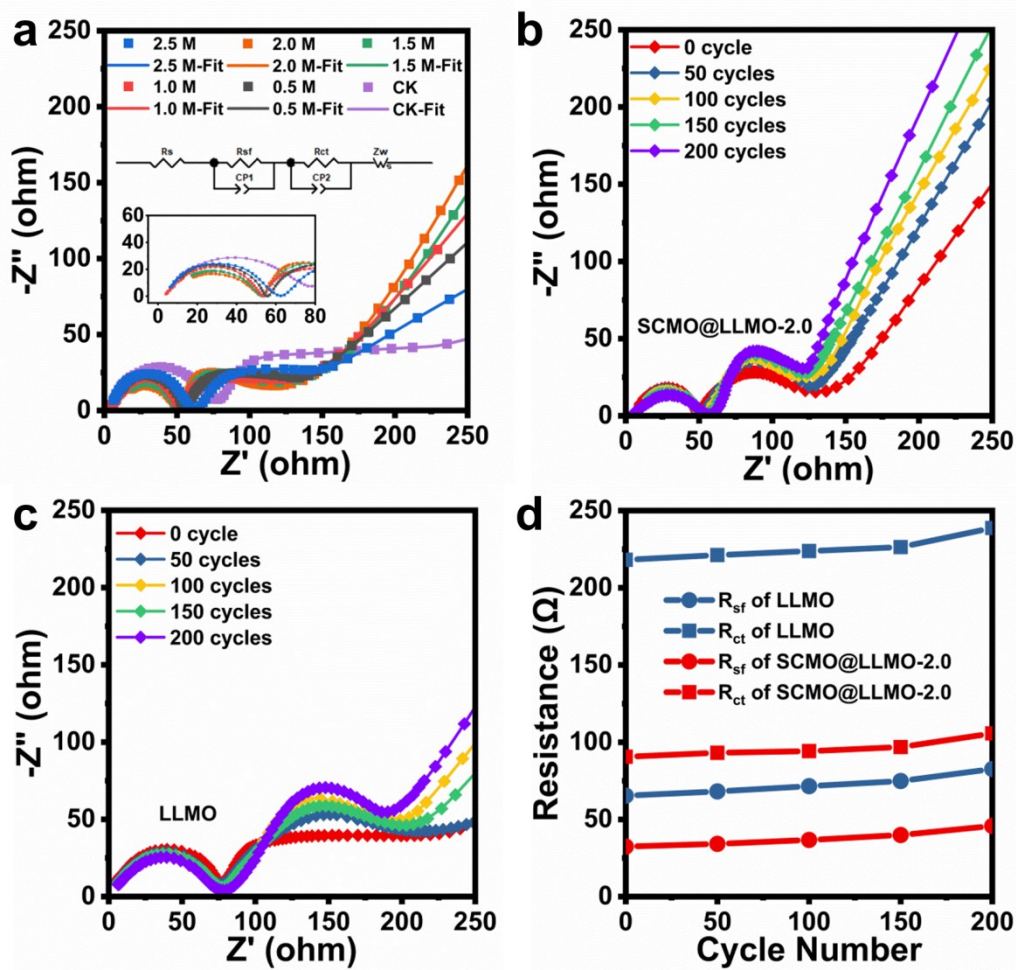

**Figure S4.** (a) Nyquist plots of the SCMO@LLMOs before cycling, (b, c) Nyquist plots of SCMO@LLMO-2.0 and LLMO of 0, 50, 100, 150, and 200 cycles, respectively. (d) The  $R_{sf}$  and  $R_{ct}$  of LLMO and SCMO@LLMO-2.0 of 0, 50, 100, 150, and 200 cycles, respectively.

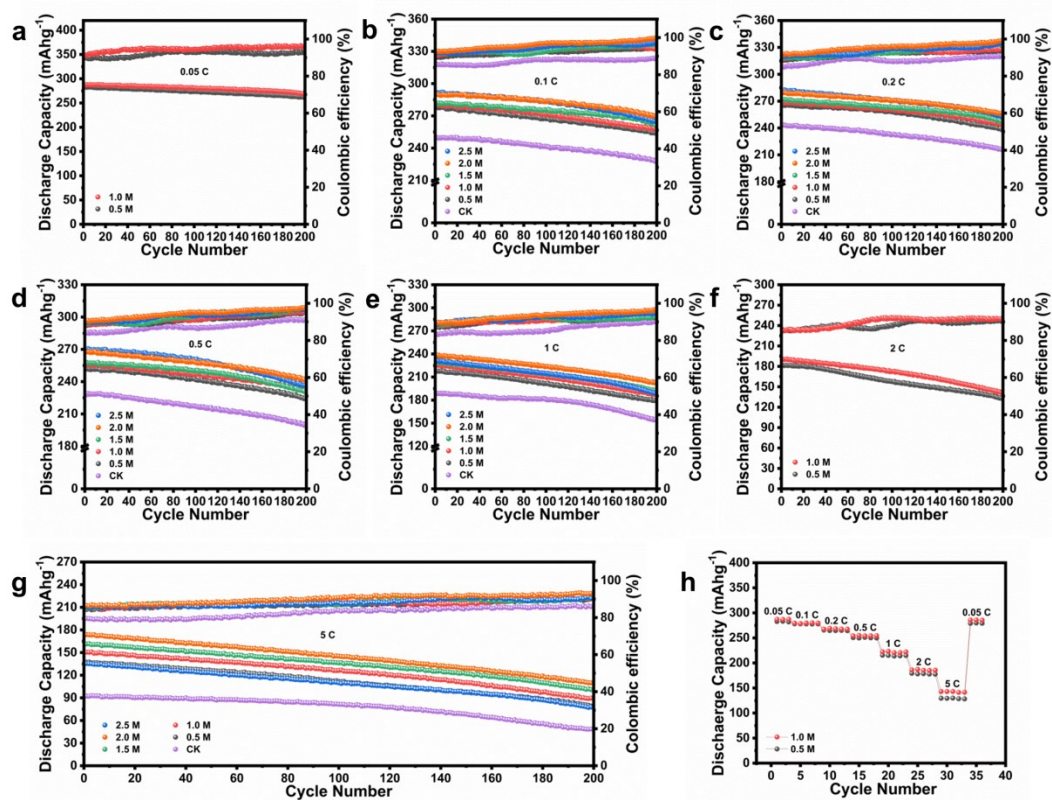

**Figure S5.** (a-g) The cycling performance curves of SCMO@LLMOs under current densities of 0.05 C, 0.1 C, 0.2 C, 0.5 C, 1 C, 2 C, and 5 C, respectively, (h) The rate performance curves of SCMO@LLMOs under current densities of 0.05 C, 0.1 C, 0.2 C, 0.5 C, 1 C, 2 C, and 5 C, respectively.



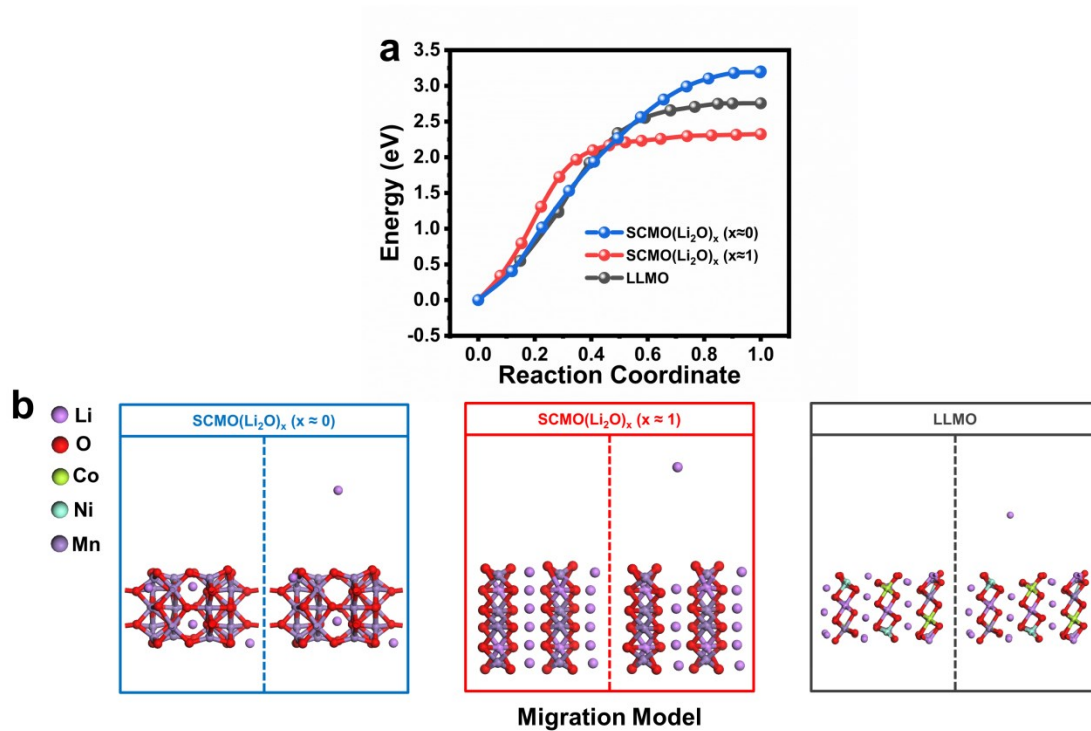

**Figure S6.** The (a) diffusion paths and (b) migration models of LLMO, SCMO(Li<sub>2</sub>O)<sub>x</sub> (x ≈ 0), and SCMO(Li<sub>2</sub>O)<sub>x</sub> (x ≈ 1), respectively.

**Table S1.** Comparison with similar modifications of LLMO.

| Modification                                | Current density (C) | Initial coulombic efficiency (%) | Initial discharge capacity (mAh g <sup>-1</sup> ) | Cycle number (#) | Capacity retention ratio (%) |
|---------------------------------------------|---------------------|----------------------------------|---------------------------------------------------|------------------|------------------------------|
| SCMO shell                                  | 0.05                | 93.0                             | 296.9                                             | 100/200          | 97.9/93.9                    |
|                                             | 0.1                 | 92.6                             | 289.8                                             | 100/200          | 97.8/92.8                    |
| (This paper)                                | 0.2                 | 91.8                             | 279.3                                             | 100/200          | 96.9/91.6                    |
|                                             | 0.5                 | 90.5                             | 267.8                                             | 100/200          | 96.3/90.2                    |
| PB coating[1]                               | 0.1                 | 85.7                             | 281.7                                             | 100              | 77.2                         |
| Injection of V-O[2]                         | 0.1                 | 79.6                             | 221.9                                             | 300              | 92.6                         |
| Mg doping[3]                                | 0.1                 | 78.5                             | 273.0                                             | 100              | 80.6                         |
| Al doping[4]                                | 0.1                 | 77.3                             | 255.0                                             | 100              | 96.0                         |
| Ni substitution [5]                         | 0.2                 | 70.6                             | 242.9                                             | 150              | 95.0                         |
| Li <sub>2</sub> TiO <sub>3</sub> coating[6] | 0.1                 | 78.6                             | 218.0                                             | 50               | 77.5                         |
| AlPO <sub>4</sub> coating[7]                | 0.2                 | 78.9                             | 267.2                                             | 50               | 73.4                         |
| Fluorine doping[8]                          | 0.2                 | 68.1                             | 220.0                                             | 100              | 79.7                         |
| Cr Doping[9]                                | 0.2                 | 97.7                             | 219.0                                             | 133              | 77.6                         |
| Carbon coating[10]                          | 0.2                 | 96.7                             | 263.0                                             | 100              | 70                           |
| Graphene oxide[11]                          | 0.2                 | 87.3 (0.05 C)                    | 238                                               | 50               | 79.4                         |
| MgO coating[12]                             | 1                   | 78.0 (0.1 C)                     | 260.8 (0.1 C)                                     | 100              | 96.4                         |
| Na-stablization[13]                         | 0.1                 | 87.5                             | 307.0                                             | 100 (0.3 C)      | 89.0 (0.3 C)                 |
| Ru substitution[14]                         | 0.05                | 81.4                             | 279.3                                             | 50 (0.2 C)       | 81.5 (0.2 C)                 |
| AlF <sub>3</sub> coating[15]                | 0.2                 | 89.5                             | 246.0                                             | 50               | 93.2                         |
| Al <sub>2</sub> O <sub>3</sub> coating[16]  | 0.05                | 85.0                             | 275.0                                             | -                | -                            |
| Al substitution[17]                         | 0.1                 | 92.9                             | 262.0                                             | -                | -                            |
| LiFePO <sub>4</sub> blending[18]            | 0.3                 | 79.4                             | 230.0                                             | 50               | 102.6                        |
| Double-layer coating[19]                    | 0.05                | 98.0                             | 298.0                                             | 30               | 89.7                         |
| V <sub>2</sub> O <sub>5</sub> composite[20] | 0.05                | 123.9                            | 300                                               | 25               | 58.3                         |



**Table S2.** The chemical reaction of synthesis process.

| <b>Stage</b>         | <b>Chemical Reaction</b>                                                                                                      |
|----------------------|-------------------------------------------------------------------------------------------------------------------------------|
| <b>Acid-tearment</b> | $\text{H}_2\text{SO}_4 + \text{Mn}(\text{OH})_2 \rightarrow \text{MnSO}_4 + \text{H}_2\text{O}$                               |
| <b>Hydrotherm</b>    | $\text{MnSO}_4 + \text{KMnO}_4 + \text{H}_2\text{O} \rightarrow \text{MnO}_2 + \text{K}_2\text{SO}_4 + \text{H}_2\text{SO}_4$ |
| <b>Calcining</b>     | $\text{Mn}(\text{OH})_2 \rightarrow \text{MnO}_2 + \text{H}_2\text{O}$                                                        |

**Table S3.** The specific surface area (BET) and the pore size distribution ratio of SCMO@LLMO-2.0 and LLMO.

| Sample        | Specific Surface Area (P/P <sub>0</sub> =0.2) | Pore Size Distribution Ratio |         |        |
|---------------|-----------------------------------------------|------------------------------|---------|--------|
|               |                                               | 1-5 nm                       | 5-10 nm | >10 nm |
| SCMO@LLMO-2.0 | 96.475 m <sup>2</sup> g <sup>-1</sup>         | 1-5 nm                       | 5-10 nm | >10 nm |
|               |                                               | 96.2%                        | 3.7%    | 0.1%   |
| LLMO          | 75.227 m <sup>2</sup> g <sup>-1</sup>         | 1-5 nm                       | 5-10 nm | >10 nm |
|               |                                               | 89.6%                        | 10.3%   | 0.1%   |

**Table S4.** Comparison of XRD Rietveld refinement data of SCMO@LLMO-2.0 and LLMO.

| Sample        | Lattice<br>Phase parameters (Å<br>) | Atomic occupancy and position |            |                |                  | Proportion<br>(%) | c/a         | Ni[3b]/Li[3b] |
|---------------|-------------------------------------|-------------------------------|------------|----------------|------------------|-------------------|-------------|---------------|
|               |                                     | Li                            | Mn         | Ni             | Co               |                   |             |               |
| SCMO@LLMO-2.0 | a=4.955772                          | 1.0000[2b][2b][4h]1.0000[4g]  |            |                |                  | 92.402            | 5.002496091 | 0             |
|               | b=8.552964                          |                               |            |                |                  |                   |             |               |
|               | c=5.020708                          |                               |            |                |                  |                   |             |               |
|               | $\beta$ =109.3154                   |                               |            |                |                  |                   |             |               |
|               | <b>R-3m</b>                         | a=b=2.868085                  | [3b]1.0000 | 0.5912[3a][3a] | 0.11550.2360[3a] | 7.598             |             |               |
|               |                                     | c=14.347584                   |            |                |                  |                   |             |               |
| LLMO          | a=4.941426                          | 1.0000[2b][2b][4h]1.0000[4g]  |            |                |                  | 90.528            | 5.034466955 | 0.035554      |
|               | b=8.549039                          |                               |            |                |                  |                   |             |               |
|               | c=5.024958                          |                               |            |                |                  |                   |             |               |
|               | $\beta$ =109.2163                   |                               |            |                |                  |                   |             |               |
|               | <b>R-3m</b>                         | a=b=2.853922                  | [3b]0.8691 | 0.5764[3a][3a] | 0.11400.2320[3a] | 9.472             |             |               |
|               |                                     | c=14.367976                   | [3a]0.0309 | [3b]0.0309     |                  |                   |             |               |

**Table S5.** XPS peak fitting data of SCMO@LLMO-2.0 and LLMO.

| Sample        | Ni                                                | Co                                                | Mn                                                |
|---------------|---------------------------------------------------|---------------------------------------------------|---------------------------------------------------|
| SCMO@LLMO-2.0 | (70.87%Ni <sup>2+</sup> /29.13%Ni <sup>3+</sup> ) | (58.52%Co <sup>3+</sup> /41.48%Co <sup>2+</sup> ) | (96.18%Mn <sup>4+</sup> /3.82%Mn <sup>3+</sup> )  |
|               | 2p3/2 854.76Ni <sup>2+</sup>                      | 2p3/2 780.14Co <sup>3+</sup>                      | 2p3/2 640.6Mn <sup>3+</sup>                       |
|               | 856.53Ni <sup>3+</sup>                            | 780.74Co <sup>2+</sup>                            | 641.90Mn <sup>4+</sup> ; 642.93Mn <sup>4+</sup> ; |
|               | 2p1/2 872.18Ni <sup>2+</sup>                      | 2p1/2 795.09Co <sup>3+</sup>                      | 643.59Mn <sup>4+</sup> ; 644.21Mn <sup>4+</sup> ; |
|               | 874.32Ni <sup>3+</sup>                            | 796.48Co <sup>2+</sup>                            | 645.04Mn <sup>4+</sup> ; 646.16Mn <sup>4+</sup> . |
| LLMO          | (73.88%Ni <sup>2+</sup> /26.13%Ni <sup>3+</sup> ) | (73.05%Co <sup>3+</sup> /26.95%Co <sup>2+</sup> ) | (95.14%Mn <sup>4+</sup> /4.86%Mn <sup>3+</sup> )  |
|               | 2p3/2 854.7Ni <sup>2+</sup>                       | 2p3/2 780.09Co <sup>3+</sup>                      | 2p3/2 640.85Mn <sup>3+</sup>                      |
|               | 856.75Ni <sup>3+</sup>                            | 780.94Co <sup>2+</sup>                            | 642.06Mn <sup>4+</sup> ; 643.21Mn <sup>4+</sup> ; |
|               | 2p1/2 871.99Ni <sup>2+</sup>                      | 2p1/2 795.07Co <sup>3+</sup>                      | 644.32Mn <sup>4+</sup> ; 645.35Mn <sup>4+</sup> ; |
|               | 874.26Ni <sup>3+</sup>                            | 796.68Co <sup>2+</sup>                            | 646.45Mn <sup>4+</sup> ; 647.79Mn <sup>4+</sup> . |

**Table S6.** Electrochemical impedance fitting data of SCMO@LLMOs.

| Sample    | $R_s/\Omega$ | $R_{sp}/\Omega$ | $R_{ct}/\Omega$ | $\sigma_w$ | $D_{Li^+}/(cm^2 \cdot s^{-1}) \cdot 10^{-16}$ |
|-----------|--------------|-----------------|-----------------|------------|-----------------------------------------------|
| Untreated | 3.23         | 71.50           | 223.79          | 22.17      | 0.63806548996366                              |
| 0.5 M     | 4.82         | 48.25           | 124.70          | 14.54      | 1.48863575650532                              |
| 1.0 M     | 6.37         | 44.05           | 117.21          | 12.76      | 1.91081840722379                              |
| 1.5 M     | 7.75         | 40.97           | 106.49          | 11.82      | 2.27621075223101                              |
| 2.0 M     | 9.31         | 36.74           | 94.24           | 9.94       | 3.19335395775053                              |
| 2.5 M     | 4.19         | 53.11           | 139.35          | 13.57      | 1.70797489965782                              |

## Reference

- [1] Z. Xu, L. Ci, Y. Yuan, X. Nie, J. Li, J. Cheng, Q. Sun, Y. Zhang, G. Han, G. Min, J. Lu, Potassium Prussian blue-coated Li-rich cathode with enhanced lithium ion storage property, *Nano Energy* 75 (2020) 104942. <https://doi.org/10.1016/j.nanoen.2020.104942>.
- [2] P. Yan, J. Zheng, Z.K. Tang, A. Devaraj, G. Chen, K. Amine, J.G. Zhang, L.M. Liu, C. Wang, Injection of oxygen vacancies in the bulk lattice of layered cathodes, *Nat. Nanotechnol.* 14 (2019) 602–608. <https://doi.org/10.1038/s41565-019-0428-8>.
- [3] P.K. Nayak, J. Grinblat, E. Levi, M. Levi, B. Markovsky, D. Aurbach, Understanding the influence of Mg doping for the stabilization of capacity and higher discharge voltage of Li- and Mn-rich cathodes for Li-ion batteries, *Phys. Chem. Chem. Phys.* 19 (2017) 6142–6152. <https://doi.org/10.1039/C6CP07383B>.
- [4] P.K. Nayak, J. Grinblat, M. Levi, E. Levi, S. Kim, J.W. Choi, D. Aurbach, Al doping for mitigating the capacity fading and voltage decay of layered Li and Mn-rich cathodes for Li-ion batteries, *Adv. Energy Mater.* 6 (2016) 114639849. <https://doi.org/10.1002/aenm.201502398>.
- [5] P. Kumar Nayak, J. Grinblat, E. Levi, T.R. Penki, M. Levi, Y.K. Sun, B. Markovsky, D. Aurbach, Remarkably improved electrochemical performance of Li- and Mn-Rich cathodes upon substitution of Mn with Ni, *ACS Appl. Mater. Inter.* 9 (2017) 4309–4319. <https://doi.org/10.1021/acsami.6b07959>.
- [6] E. Zhao, X. Liu, Z. Hu, L. Sun, X. Xiao, Facile synthesis and enhanced electrochemical performances of  $\text{Li}_2\text{TiO}_3$ -coated lithium-rich layered  $\text{Li}_{1.13}\text{Ni}_{0.30}\text{Mn}_{0.57}\text{O}_2$  cathode materials for lithium-ion batteries, *J. Power Sour.* 294 (2015) 141–149. <https://doi.org/10.1016/j.jpowsour.2015.06.059>.
- [7] F. Wu, X. Zhang, T. Zhao, L. Li, M. Xie, R. Chen, Multifunctional  $\text{AlPO}_4$  coating for improving electrochemical properties of low-cost  $\text{Li}[\text{Li}_{0.2}\text{Fe}_{0.1}\text{Ni}_{0.15}\text{Mn}_{0.55}]\text{O}_2$  cathode materials for lithium-ion batteries, *ACS Appl. Mater. Inter.* 7 (2015) 3773–3781. <https://doi.org/10.1021/am508579r>.
- [8] L. Li, B.H. Song, Y.L. Chang, H. Xia, J.R. Yang, K.S. Lee, L. Lu, Retarded phase transition by fluorine doping in Li-rich layered  $\text{Li}_{1.2}\text{Mn}_{0.54}\text{Ni}_{0.13}\text{Co}_{0.13}\text{O}_2$  cathode material, *J. Power Sour.* 283 (2015) 162–170. <https://doi.org/10.1016/j.jpowsour.2015.02.085>.
- [9] B. Song, C. Zhou, H. Wang, H. Liu, Z. Liu, M.O. Lai, L. Lu, Advances in sustain stable voltage of Cr-Doped Li-Rich layered cathodes for lithium ion batteries, *J. Electrochem. Soc.* 161 (2014) A1723–A1730. <https://doi.org/10.1149/2.0461410jes>.

- [10] B. Song, C. Zhou, Y. Chen, Z. Liu, M.O. Lai, J. Xue, L. Lu, Role of carbon coating in improving electrochemical performance of Li-rich  $\text{Li}(\text{Li}_{0.2}\text{Mn}_{0.54}\text{Ni}_{0.13}\text{Co}_{0.13})\text{O}_2$  cathode, *RSC Adv.* 4 (2014) 44244–44252. <https://doi.org/10.1039/C4RA04976D>.
- [11] B. Song, M.O. Lai, Z. Liu, H. Liu, L. Lu, Graphene-based surface modification on layered Li-rich cathode for high-performance Li-ion batteries, *J. Mater.Chem. A* 1 (2013) 9954–9965. <https://doi.org/10.1039/C3TA11580A>.
- [12] S.J. Shi, J.P. Tu, Y.Y. Tang, X.Y. Liu, Y.Q. Zhang, X.L. Wang, C.D. Gu, Enhanced cycling stability of  $\text{Li}[\text{Li}_{0.2}\text{Mn}_{0.54}\text{Ni}_{0.13}\text{Co}_{0.13}]\text{O}_2$  by surface modification of MgO with melting impregnation method, *Electrochim. Acta* 88 (2013) 671–679. <https://doi.org/10.1016/j.electacta.2012.10.111>.
- [13] W. He, D. Yuan, J. Qian, X. Ai, H. Yang, Y. Cao, Enhanced high-rate capability and cycling stability of Na-stabilized layered  $\text{Li}_{1.2}[\text{Co}_{0.13}\text{Ni}_{0.13}\text{Mn}_{0.54}]\text{O}_2$  cathode material, *J. Mater.Chem. A* 1 (2013) 11397. <https://doi.org/10.1039/C3TA12296D>.
- [14] B. Song, M.O. Lai, L. Lu, Influence of Ru substitution on Li-rich  $0.55\text{Li}_2\text{MnO}_3 \cdot 0.45\text{LiNi}_{1/3}\text{Co}_{1/3}\text{Mn}_{1/3}\text{O}_2$  cathode for Li-ion batteries, *Electrochim. Acta* 80 (2012) 187–195. <https://doi.org/10.1016/j.electacta.2012.06.118>.
- [15] G.R. Li, X. Feng, Y. Ding, S.H. Ye, X.P. Gao,  $\text{AlF}_3$ -coated  $\text{Li}(\text{Li}_{0.17}\text{Ni}_{0.25}\text{Mn}_{0.58})\text{O}_2$  as cathode material for Li-ion batteries, *Electrochim. Acta* 78 (2012) 308–315. <https://doi.org/10.1016/j.electacta.2012.05.142>.
- [16] W.C. West, J. Soler, M.C. Smart, B.V. Ratnakumar, S. Firdosy, V. Ravi, M.S. Anderson, J. Hrbacek, E.S. Lee, A. Manthiram, Electrochemical behavior of layered solid solution  $\text{Li}_2\text{MnO}_3\text{-LiMO}_2$  (M = Ni, Mn, Co) Li-Ion cathodes with and without alumina coatings, *J. Electrochem. Soc.* 158 (2011) A883. <https://doi.org/10.1149/1.3597319>.
- [17] Z. Li, N.A. Chernova, J. Feng, S. Upreti, F. Omenya, M.S. Whittingham, Stability and rate capability of al substituted lithium-rich high-manganese content oxide materials for li-ion batteries, *J. Electrochem. Soc.* 159 (2012) A116–A120. <https://doi.org/10.1149/2.044202jes>.
- [18] K.G. Gallagher, S.H. Kang, S.U. Park, S.Y. Han,  $x\text{Li}_2\text{MnO}_3 \cdot (1-x)\text{LiMO}_2$  blended with  $\text{LiFePO}_4$  to achieve high energy density and pulse power capability, *J. Power Sour.* 196 (2011) 9702–9707. <https://doi.org/10.1016/j.jpowsour.2011.07.054>.
- [19] Q.Y. Wang, J. Liu, A.V. Murugan, A. Manthiram, High capacity double-layer surface modified



Li[Li<sub>0.2</sub>Mn<sub>0.54</sub>Ni<sub>0.13</sub>Co<sub>0.13</sub>]O<sub>2</sub> cathode with improved rate capability, *J. Mater.Chem.* 19 (2009) 4965–4972. <https://doi.org/10.1039/B823506F>.

[20] J. Gao, J. Kim, A. Manthiram, High capacity Li[Li<sub>0.2</sub>Mn<sub>0.54</sub>Ni<sub>0.13</sub>Co<sub>0.13</sub>]O<sub>2</sub>-V<sub>2</sub>O<sub>5</sub> composite cathodes with low irreversible capacity loss for lithium ion batteries, *Electrochem. Commun.* 11 (2009) 84–86. <https://doi.org/10.1016/j.elecom.2008.10.036>.
